# Supplementary material for: The influence of riparian evapotranspiration on stream hydrology and nitrogen retention in a subhumid Mediterranean catchment
Source: Copernicus journal article supplement (doi:10.5194/hess-20-3831-2016), 2016-09-14
Supplement: Supplementary file 1 [file hess-20-3831-2016-supplement.pdf]

Supplement of Hydrol. Earth Syst. Sci., 20, 3831–3842, 2016  
<http://www.hydrol-earth-syst-sci.net/20/3831/2016/>  
doi:10.5194/hess-20-3831-2016-supplement  
© Author(s) 2016. CC Attribution 3.0 License.

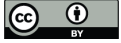

Hydrology and  
Earth System  
Sciences Open Access 

*Supplement of*

## **The influence of riparian evapotranspiration on stream hydrology and nitrogen retention in a subhumid Mediterranean catchment**

**Anna Lupon et al.**

*Correspondence to:* Anna Lupon (alupon@ub.edu)

The copyright of individual parts of the supplement might differ from the CC-BY 3.0 licence.

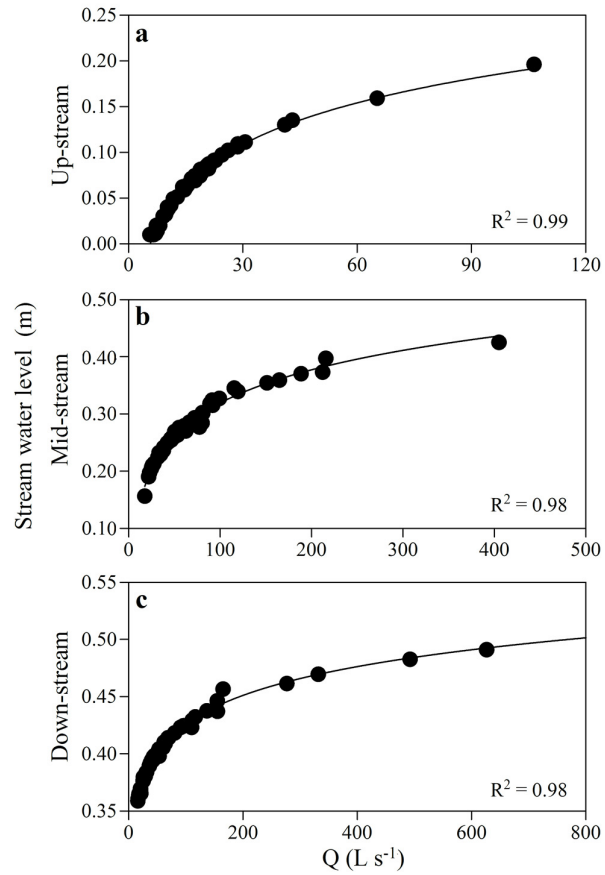

670

**Figure S1.** Regressions between discharge (Q) and stream water level for the (a) up-stream, (b) mid-stream and (c) down-stream sites during the period 2010-2012. Circles are data from slug additions and lines are the regression models. The R<sup>2</sup> values are also shown for each case. n = 57, 60 and 61 for the up-, mid- and down-stream sites, respectively. These regressions were used to infer stream discharge at 15 min intervals.

675

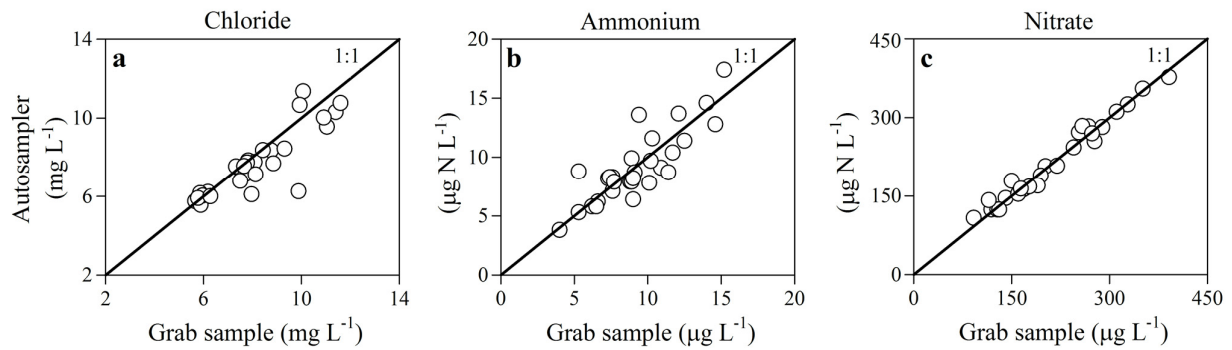

**Figure S2.** Comparison of stream water chemistry measured by grab samples vs auto-samplers. The samples collected with auto-samplers were taken in the same day than the manual ones, but the formers were then kept in the auto-sampler between 1-10 days. Data is shown for (a) chloride, (b) ammonium and (c) nitrate. The line 1:1 is also shown. The relative root-mean-square error was 3.1, 2.7 and 1.1% for chloride, ammonium and nitrate concentrations, respectively. The good match between the two types of samples suggest that biogeochemical transformation was minimal within the auto-sampler bottles.

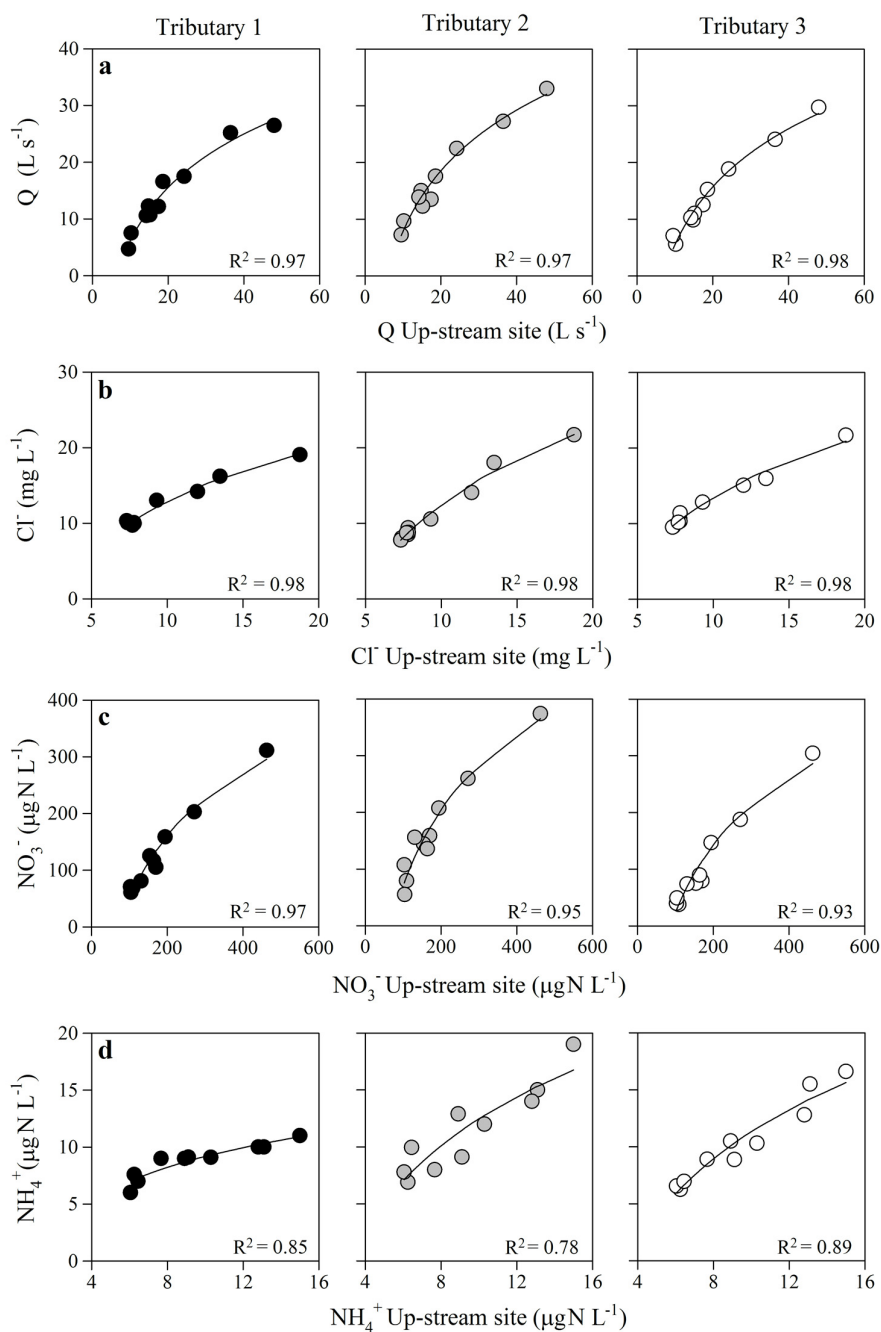

**Figure S3.** Relationship between values measured at the three main tributaries of the main stem and those measured at the up-stream site for (a) discharge and concentrations of (b) chloride, (c) nitrate, and (d) ammonium. Data was collected on the same day for a set of 11 synoptic field campaigns during the period 2010-2012 (Bernal et al., 2015). The line indicates the best fit (logarithmic model) and R<sup>2</sup> values are shown for each case. The regressions models were used to infer mean daily discharge and daily solute concentrations at each tributary from values measured at the upstream site, which were then used for mass balance calculations.

695 **Table S1.** Measured and predicted concentrations of riparian groundwater concentrations for chloride  
(Cl<sup>-</sup>), nitrate (NO<sub>3</sub><sup>-</sup>) and ammonium (NH<sub>4</sub><sup>+</sup>) at the headwater reach during the study period. The relative  
difference between measured and concentrations predicted from mass balance are also shown.  
Groundwater concentrations were measured during a parallel study conducted in the catchment, and  
are shown as the median value for the 7 wells installed along the headwater reach (< 2 m from the  
700 stream) (Bernal et al., 2015). The concentrations predicted from the mass balance approach showed a  
good match with measured concentrations, differing < 5%, 7%, and 10% for Cl<sup>-</sup>, NO<sub>3</sub><sup>-</sup>, and NH<sub>4</sub><sup>+</sup>,  
respectively. This relative difference between measured and predicted groundwater concentrations at  
the headwater reach was used as a threshold to determine when observed and predicted concentrations  
at the down-stream site differed significantly from each other.

| Day        | Cl <sup>-</sup> (mg L <sup>-1</sup> ) |           |          | NO <sub>3</sub> <sup>-</sup> (µg N L <sup>-1</sup> ) |           |          | NH <sub>4</sub> <sup>+</sup> (µg N L <sup>-1</sup> ) |           |          |
|------------|---------------------------------------|-----------|----------|------------------------------------------------------|-----------|----------|------------------------------------------------------|-----------|----------|
|            | Measured                              | Predicted | Diff (%) | Measured                                             | Predicted | Diff (%) | Measured                                             | Predicted | Diff (%) |
| 24/08/2010 | 6.8                                   | 6.5       | 4        | 246                                                  | 230       | 7        | 21                                                   | 20        | 5        |
| 27/10/2010 | 6.3                                   | 5.7       | 5        | 428                                                  | 404       | 6        | 43                                                   | 39        | 9        |
| 22/11/2010 | 7.3                                   | 7         | 4        | 99                                                   | 92        | 7        | 27                                                   | 28        | -4       |
| 19/01/2011 | 6.9                                   | 6.9       | 0        | 229                                                  | 218       | 5        | 13                                                   | 11        | 10       |
| 1/3/2011   | 6.9                                   | 6.6       | 4        | 360                                                  | 351       | 3        | 28                                                   | 27        | 4        |
| 12/4/2011  | 7                                     | 6.8       | 3        | 129                                                  | 131       | -2       | 31                                                   | 30        | 3        |
| 26/05/2011 | 6.2                                   | 6.1       | 2        | 80                                                   | 78        | 3        | 16                                                   | 17        | -6       |
| 9/8/2011   | 9.1                                   | 8.6       | 5        | 97                                                   | 102       | -5       | 26                                                   | 25        | 4        |
| 13/09/2011 | 8.7                                   | 8.5       | 2        | 111                                                  | 110       | 1        | 20                                                   | 20        | 0        |
| 26/10/2011 | 6.2                                   | 5.9       | 5        | 223                                                  | 212       | 5        | 24                                                   | 25        | -4       |
| 14/12/2011 | 7.2                                   | 7.4       | -3       | 166                                                  | 175       | -5       | 18                                                   | 16        | 10       |

705

710 **Table S2.** Annual precipitation (P), annual potential evapotranspiration (PET), P/PET ratio, percentage of riparian area within the catchment (Rip Area) and riparian water depletion (RWD) for different catchments across climatic regions. This data set was used to build Figure 6 of the main manuscript.

| Climate       | P (mm yr <sup>-1</sup> ) | PET (mm yr <sup>-1</sup> ) | P/PET | Rip Area (%) | RWD (%) | Source                     |
|---------------|--------------------------|----------------------------|-------|--------------|---------|----------------------------|
| Arid          | 250                      | 2280                       | 0.11  | 8.4          | 33      | Dahm et al., 2002          |
| Arid          | 300                      | 1800                       | 0.17  | 11.7         | 36      | Doble et al., 2006         |
| Arid          | 400                      | 1400                       | 0.29  | 3-11         | 22      | Contreras et al., 2011     |
| Arid          | 255                      | 693                        | 0.37  | ---          | 20      | Goodrich et al., 2000      |
| Arid          | 570                      | 900                        | 0.63  | ---          | 13      | Springer et al., 2006      |
| Mediterranean | 1296                     | 1911                       | 0.68  | 8.2          | 9       | Scott, 1999                |
| Mediterranean | 780                      | 1055                       | 0.72  | 3.0          | 12      | Folch and Ferrer, 2015     |
| Mediterranean | 850                      | 1170                       | 0.73  | 15.0         | 7       | Wine and Zou, 2012         |
| Mediterranean | 750                      | 990                        | 0.77  | 2.1          | 5       | Sabater and Bernal, 2011   |
| Mediterranean | 925                      | 1100                       | 0.84  | 6.0          | 3.6     | Present Study              |
| Temperate     | 1780                     | 1400                       | 1.27  | 8.4          | 4       | Dunford and Fletcher, 1947 |
| Temperate     | 858                      | 590                        | 1.45  | 8.0          | 3       | Petrone et al., 2007       |
| Temperate     | 1523                     | 1011                       | 1.51  | ---          | 2.5     | Salemi et al., 2012        |
| Temperate     | 1800                     | 900                        | 2.00  | 11.0         | 1.2     | Dunford and Fletcher, 1947 |
| Tropical      | 4370                     | 1825                       | 2.39  | 2.5-6.6      | 1.4     | Cadol et al., 2012         |

715 **References**

- Cadol, D., Kampf, S. and Wohl, E.: Effects of evapotranspiration on baseflow in a tropical headwater catchment, *J. Hydrol.*, 462-463, 4–14, 2012.
- Contreras, S., Jobbágy, E. G., Villagra, P. E., Nosoetto, M. D. and Puigdefábregas, J.: Remote sensing estimates of supplementary water consumption by arid ecosystems of central Argentina, *J. Hydrol.*, 720 397(1-2), 10–22, 2011.
- Dahm, C. N., Cleverly, J. R., Coonrod E. Allred, J., Thibault, J. R., McDonnell, D. E. and Gilroy, D. J.: Evapotranspiration at the land/ water interface in a semi-arid drainage basin, *Freshw. Biol.*, 47(4), 831–844, 2002.
- Doble, R., Simmons, C., Jolly, I. and Walker, G.: Spatial relationships between vegetation cover and irrigation-induced groundwater discharge on a semi-arid floodplain, Australia, *J. Hydrol.*, 725 329(1-2), 75–97, 2006.
- Dunford, E. G. and Fletcher, P. W.: Effect of removal of stream-bank vegetation upon water yield, *Am. Geophys. Union*, 28(1), 105–110, 1947.
- Folch, A. and Ferrer, N.: The impact of poplar tree plantations for biomass production on the aquifer water budget and base flow in a Mediterranean basin., *Sci. Total Environ.*, 524-525, 213–24, 2015.
- 730 Goodrich, D. C., Scott, R., Qi, J., Goff, B., Unkrich, C. L., Moran, M. S., Williams, D., Schaeffer, S., Snyder, K., MacNish, R., Maddock, T., Pool, D., Chehbouni, A., Cooper, D. I., Eichinger, W. E., Shuttleworth, W. J., Kerr, Y., Marsett, R. and Ni, W.: Seasonal estimates of riparian evapotranspiration using remote and in situ measurements, *Agric. For. Meteorol.*, 105(1-3), 281–309, 2000.
- 735 Petrone, R. M., Silins, U., and Devito, K. J.: Dynamics of evapotranspiration from a riparian pond complex in the Western Boreal Forest, Alberta, Canada. *Hydr. Proc.*, 21(11), 1391-1401, 2007.
- Sabater, F. and Bernal, S.: Keeping healthy riparian and aquatic ecosystems in theMediterranean: challenges and solutions through riparian forest management., in *Water for Forests and People in the Mediterranean*, edited by M. Boirot, Y., Gracia, C., Palahí, pp. 151–155., 2011.
- 740 Salemi, L. F., Groppo, J. D., Trevisan, R., Marcos de Moraes, J., de Paula Lima, W. and Martinelli, L. A.: Riparian vegetation and water yield: A synthesis, *J. Hydrol.*, 454-455, 195–202, 2012.
- Scott, D. F.: Managing riparian zone vegetation to sustain streamflow: results of paired catchment experiments in South Africa, *Can. J. For. Res.*, 29, 1149– 1157, 1999.
- Springer, A. E., Amentt, M. a., Kolb, T. E. and Mullen, R. M.: Evapotranspiration of two vegetation

745 communities in a high-elevation riparian meadow at Hart Prairie, Arizona, *Water Resour. Res.*, 42(3), 1–11, 2006.

Wine, M. L. and Zou, C. B.: Long-term streamflow relations with riparian gallery forest expansion into tallgrass prairie in the Southern Great Plains, USA, *For. Ecol. Manage.*, 266, 170–179, 2012.
